# Supplementary material for: An exported protein-interacting complex involved in the trafficking of virulence determinants in Plasmodium-infected erythrocytes
Source: PubMed Central journal article supplement (PMC5508133; doi:10.1038/ncomms16044), 2017-07-10
Supplement: ncomms16044-s1.pdf [file ncomms16044-s1.pdf]

**File Name:** Supplementary Information

**Description:** Supplementary Figures and Supplementary Tables

**File Name:** Peer Review File

**Description:**

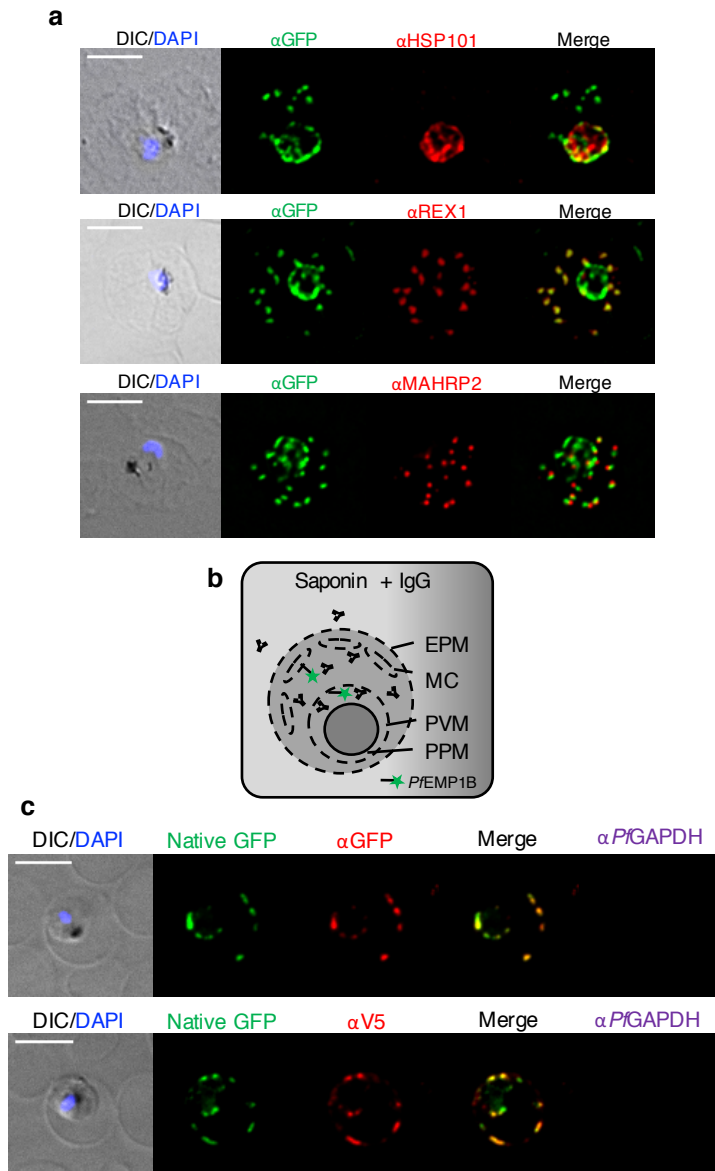

### Supplementary Figure 1 | Immunofluorescence and proximity ligation microscopy reveal *PfEMP1B* organisation

**(a)** Immunofluorescence analysis of *PfEMP1B*-infected RBCs labelled with antisera recognising GFP (green) and HSP101 or REX1 or MAHRP2 (red). **(b)** Schematic of antibody access in saponin-permeabilised *PfEMP1B*-infected RBCs. Cells were treated with saponin and lightly fixed before antibody (IgG) labelling. EPM, erythrocyte plasma membrane; MC, Maurer's clefts; PVM, parasitophorous vacuole membrane; PPM, parasite plasma membrane. **(c)** Immunofluorescence analysis of saponin-permeabilised *PfEMP1B*-infected RBCs labelled with antisera recognising GFP or V5 (red). Native GFP fluorescence is shown in green. *PfGAPDH* is shown as a control, indicating that the PPM is not breached. **(a, c)** DIC images and parasite nuclei (stained with DAPI; blue) are shown on the left. Scale bars = 5  $\mu$ m.

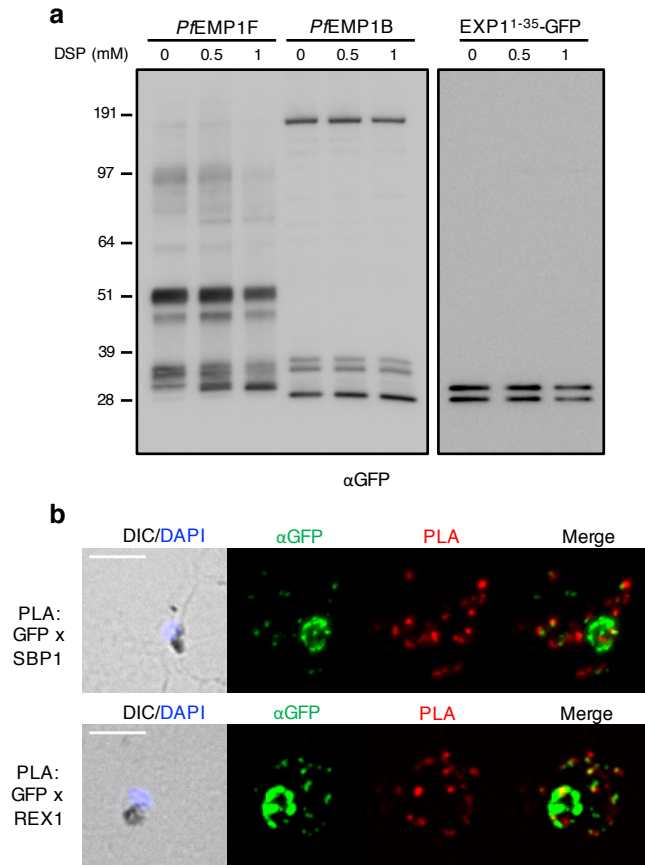

**Supplementary Figure 2 | Immunoprecipitation of *Pf*EMP1B and interactions with Maurer's cleft proteins**

**(a)** Immunoprecipitation (IP) using GFP-Trap® of *Pf*EMP1F, *Pf*EMP1B and EXP1<sup>1-35</sup>-GFP (see Fig. 2b) parasite lysates after crosslinking with increasing concentrations of DSP. Eluates were prepared for Western blot and probed with anti-GFP. Molecular masses are shown in kDa. **(b)** Proximity ligation analysis (PLA) of *Pf*EMP1B-infected RBCs labelled with antisera recognising GFP and SBP1 or REX1. PLA signal is only produced if primary epitopes are ≤40 nm apart. DIC and DAPI (blue), anti-GFP (green) and PLA (red) are shown. Scale bars = 5 μm.

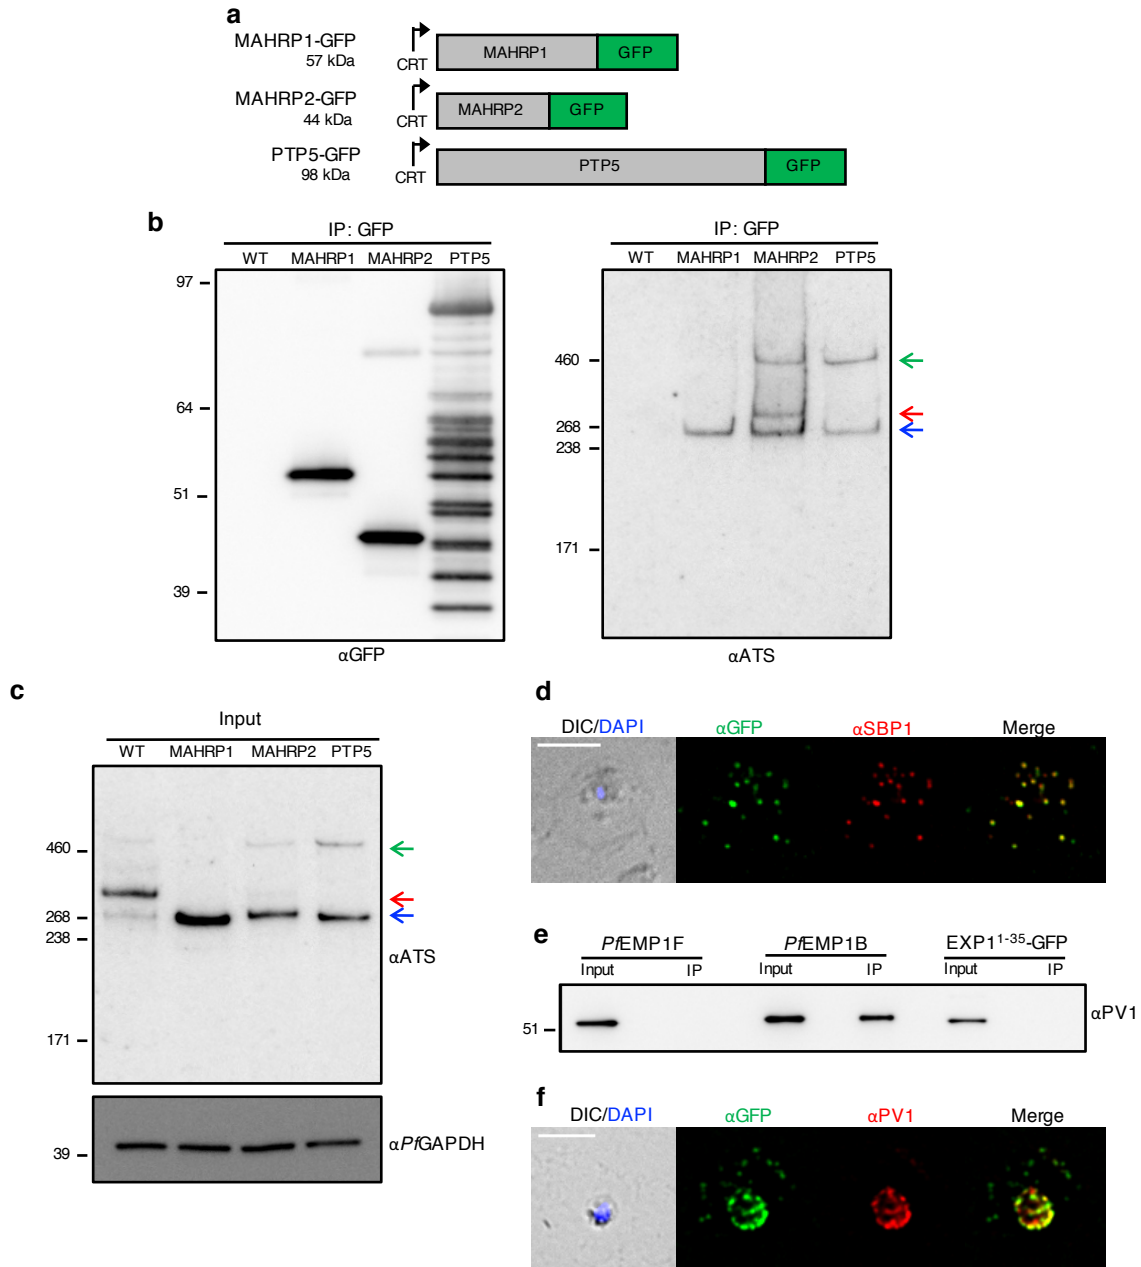

### Supplementary Figure 3 | Confirmation of *PfEMP1* interactions identified in mass spectrometric analysis of *PfEMP1B* IP

(a) Schematic of exported GFP-fusion proteins used in IP experiments. MAHRP1, MAHRP2 and PTP5 were fused to GFP and expressed in infected RBCs under the control of the CRT promoter. Sizes of fusion proteins are indicated. (b, c) Immunoprecipitation of MAHRP1-GFP, MAHRP2-GFP and PTP5-GFP parasite lysates using GFP-Trap®. (b) Eluates were prepared for Western blot and probed with anti-GFP and anti-*PfEMP1* (ATS) antisera. (c) Total protein (input) was prepared for Western blot and probed with anti-*PfEMP1* (ATS) and anti-GAPDH antisera. (b, c) Arrows indicate different *PfEMP1* variants. (d) Immunofluorescence analysis of PTP5-GFP infected RBCs labelled with antisera recognising GFP (green) and SBP1 (red). (e) Immunoprecipitation of *PfEMP1F*, *PfEMP1B* and EXP1<sup>1-35</sup>-GFP transfectants using GFP-Trap®. Total protein (input) and eluate (IP) were prepared for Western blot and probed with anti-PV1 antisera. (f) Immunofluorescence analysis of *PfEMP1B*-infected RBCs labelled with antisera recognising GFP (green) and PV1 (red).

**(b,c,e)** Molecular masses are shown in kDa. **(d,f)** DIC and DAPI (blue) are shown on the left. Scale bars = 5  $\mu\text{m}$ .

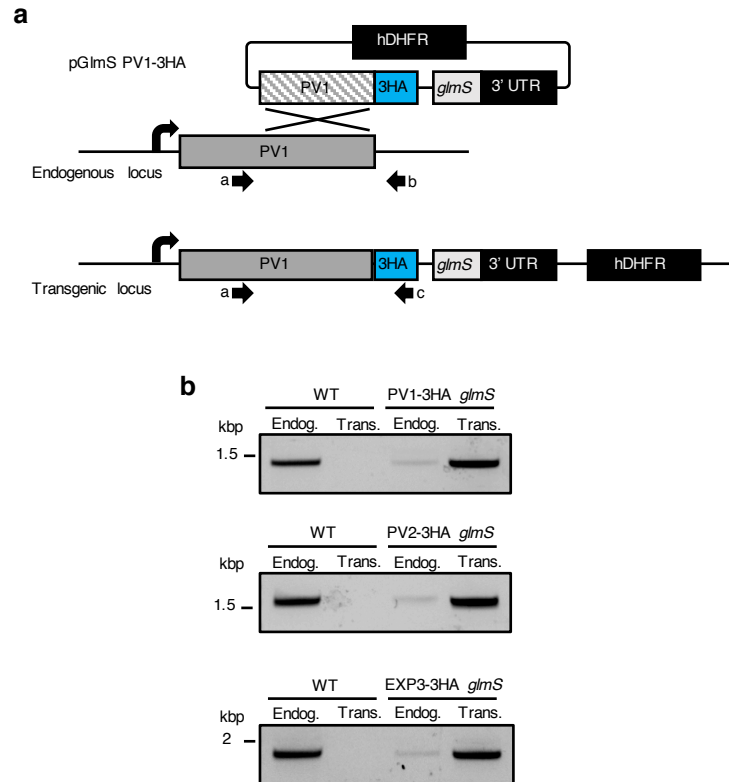

### Supplementary Figure 4 | Generation of PV1-HA, PV2-HA and EXP3-HA *glmS* knockdown parasite transfectants

**(a)** Schematic of targeting construct designed to integrate into the endogenous *Pfppv1* locus by single crossover recombination. Arrows indicate positions of oligonucleotides used to confirm integration. hDHFR, human dihydrofolate reductase; 3HA, 3xHA epitope tag; *glmS*; *glmS* ribozyme. Similar constructs were generated to integrate into the *Pfppv2* and *Pfexp3* loci.

**(b)** Diagnostic PCR analysis of wildtype (WT) and PV1, PV2 and EXP3 knockdown transfectant parasite lines using oligonucleotides targeting sites a, b and c. Oligonucleotide pair a/b amplifies the endogenous locus (Endog.) whilst oligonucleotide pair a/c amplifies the transgenic locus (Trans.). DNA size is shown in kbp.

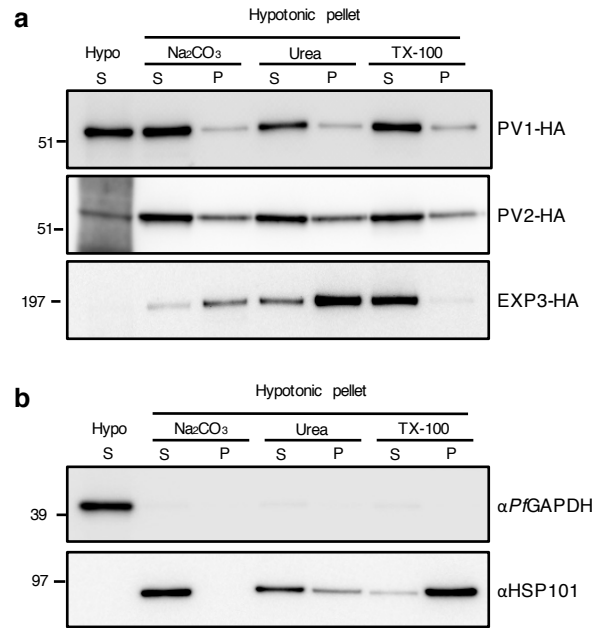

**Supplementary Figure 5 | Solubility analysis of PV1-HA, PV2-HA and EXP3-HA**  
**(a,b)** Solubility analysis of purified PV1-HA, PV2-HA and EXP3-HA infected RBCs. After hypotonic release of soluble proteins (Hypo), protein pellets were subjected to treatment with sodium carbonate (Na<sub>2</sub>CO<sub>3</sub>), urea or TX-100. **(a)** Western blots of resulting supernatants (S) and pellets (P) were probed with anti-HA or, **(b)** anti-GAPDH and anti-HSP101 antisera. **(a,b)** Molecular masses are shown in kDa.

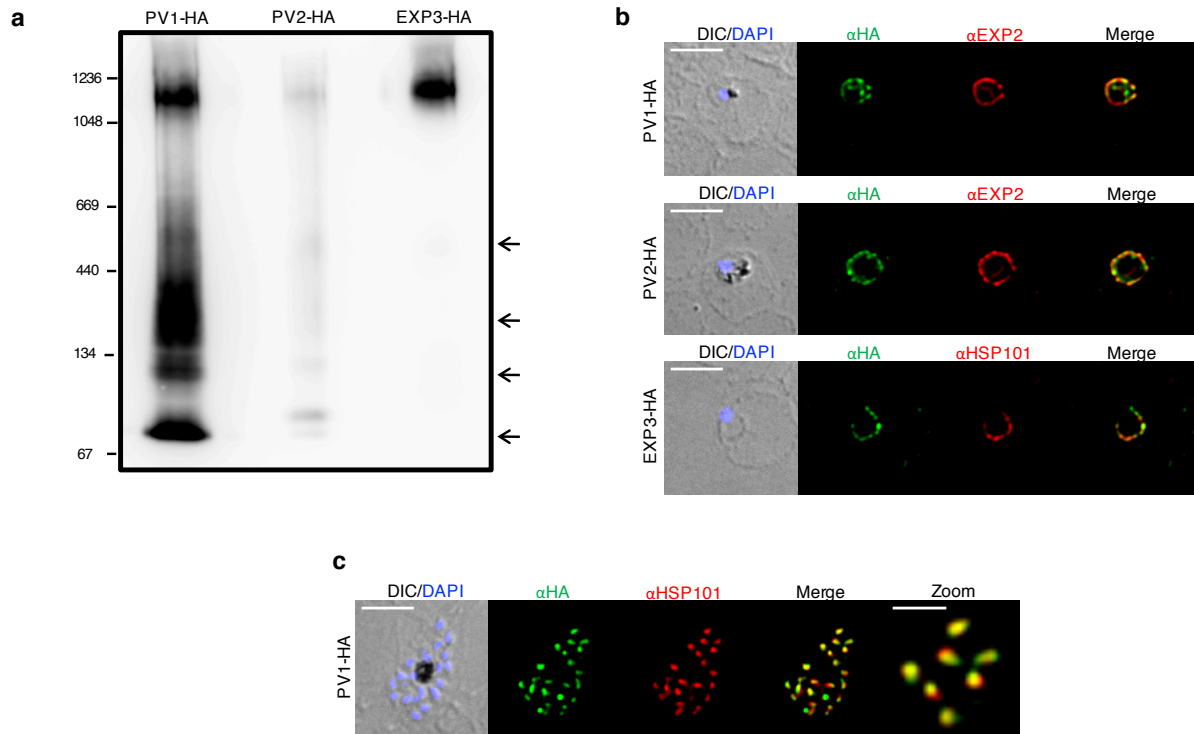

**Supplementary Figure 6 | EPIC and PTEX co-localise in the PV and in the dense granules**

**(a)** Full-length blot showing smaller protein complexes from blue native (BN)-PAGE analysis of PV1-HA, PV2-HA and EXP3-HA infected RBCs in Fig 5a. Western blots were probed with anti-HA antisera. Arrows indicate different size protein complexes. Molecular masses are shown in kDa. **(b, c)** Immunofluorescence analysis of RBCs infected with PV1-HA, PV2-HA and EXP3-HA transfectants at the early trophozoite **(b)** and schizont **(c)** stages, labelled with antisera recognising HA (green) and HSP101 or EXP2 (red). **(b,c)** DIC and DAPI (blue) are shown on the left. Scale bars = 5  $\mu$ m. Zoom scale bar = 1  $\mu$ m



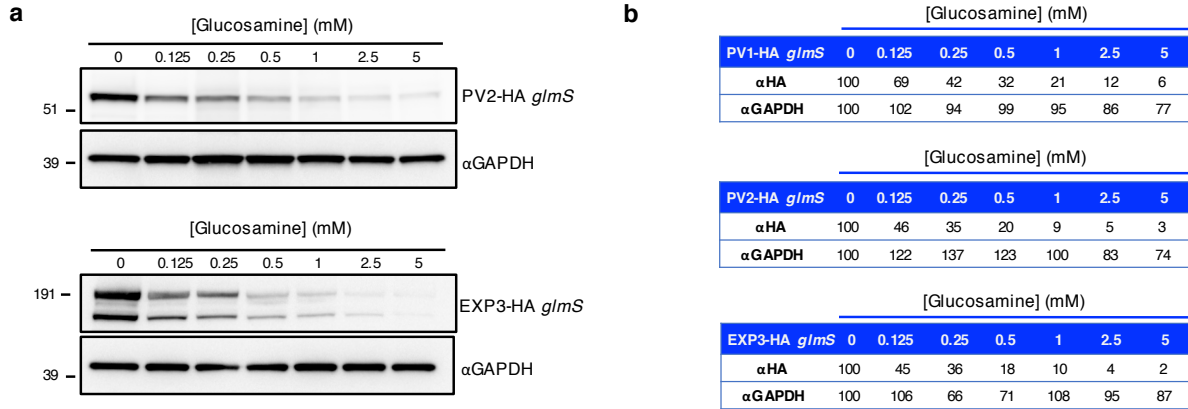

### Supplementary Figure 7 | Quantitation of glucosamine-mediated knockdown of PV1-HA, PV2-HA and EXP3-HA

**(a)** PV2-HA and EXP3-HA *glmS* parasite-infected RBCs treated with increasing concentrations of glucosamine (GlcN) from the trophozoite stage of the previous cycle. Western blots (anti-HA) confirm knockdown of expression of PV2-HA and EXP3-HA. Molecular masses are shown in kDa. **(b)** Densitometry of anti-HA and anti-GAPDH signals in PV1-HA, PV2-HA and EXP3-HA knockdown Westerns shown in Figure 7a and Supplementary Figure 7a. Signal intensities are represented as a percentage of the anti-HA and anti-GAPDH signal intensities in untreated samples (0 mM GlcN).

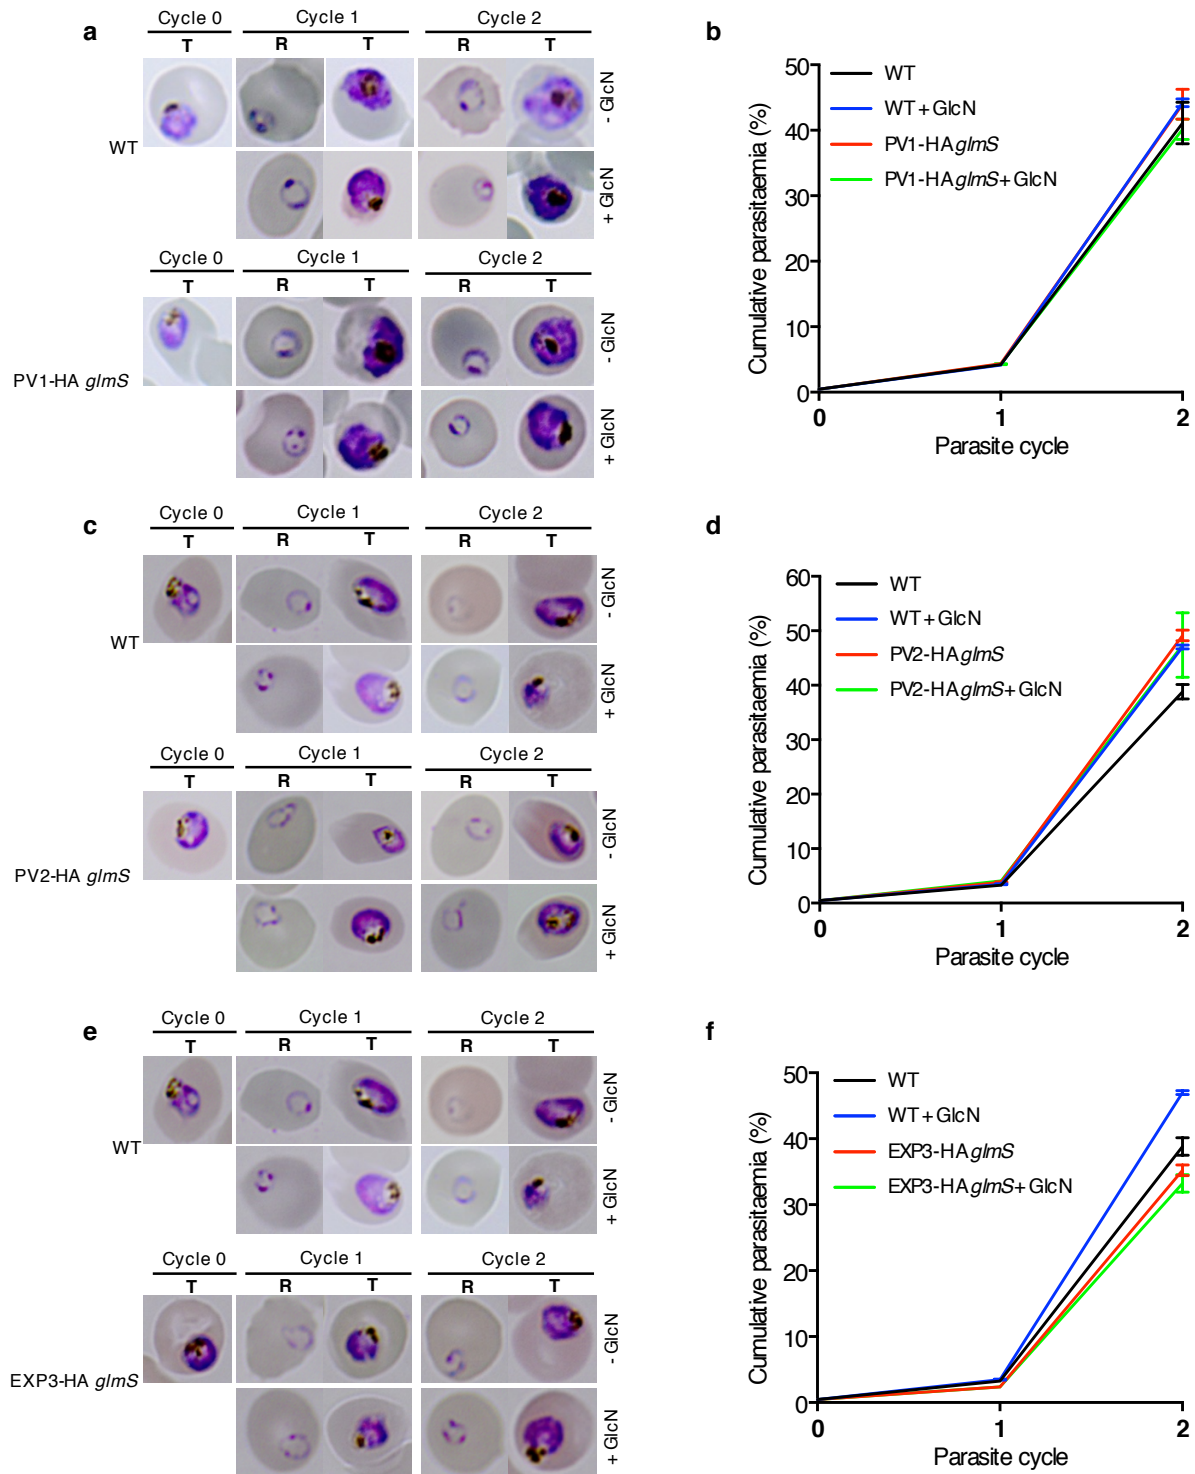

**Supplementary Figure 8 | Knockdown of PV1-HA, PV2-HA and EXP3-HA does not affect parasite viability *in vitro***

Analysis of PV1-HA, PV2-HA and EXP3-HA parasite growth after knockdown. Parasite cultures were synchronised to a 2-hour window and treated with 0 mM or 2.5 mM GlcN at the mid-trophozoite-stage. **(a,c,e)** Giemsa smears of representative infected RBCs every 24 hours following addition of GlcN at 30-32 hours post-invasion (h.p.i.) (Cycle 0) in wildtype (WT) or PV1-HA *glmS*, PV2-HA *glmS* and EXP3-HA *glmS* parasite lines. R = ring-stage, T= trophozoite-stage. **(b,d,f)** Parasitaemia of treated cultures was determined every 48 hours

(starting from Cycle 1 trophozoite-stage) using flow cytometry (3 technical triplicates). Cumulative % parasitaemia  $\pm$  S.E.M. was determined by taking into account parasite sub-culturing during the assay.

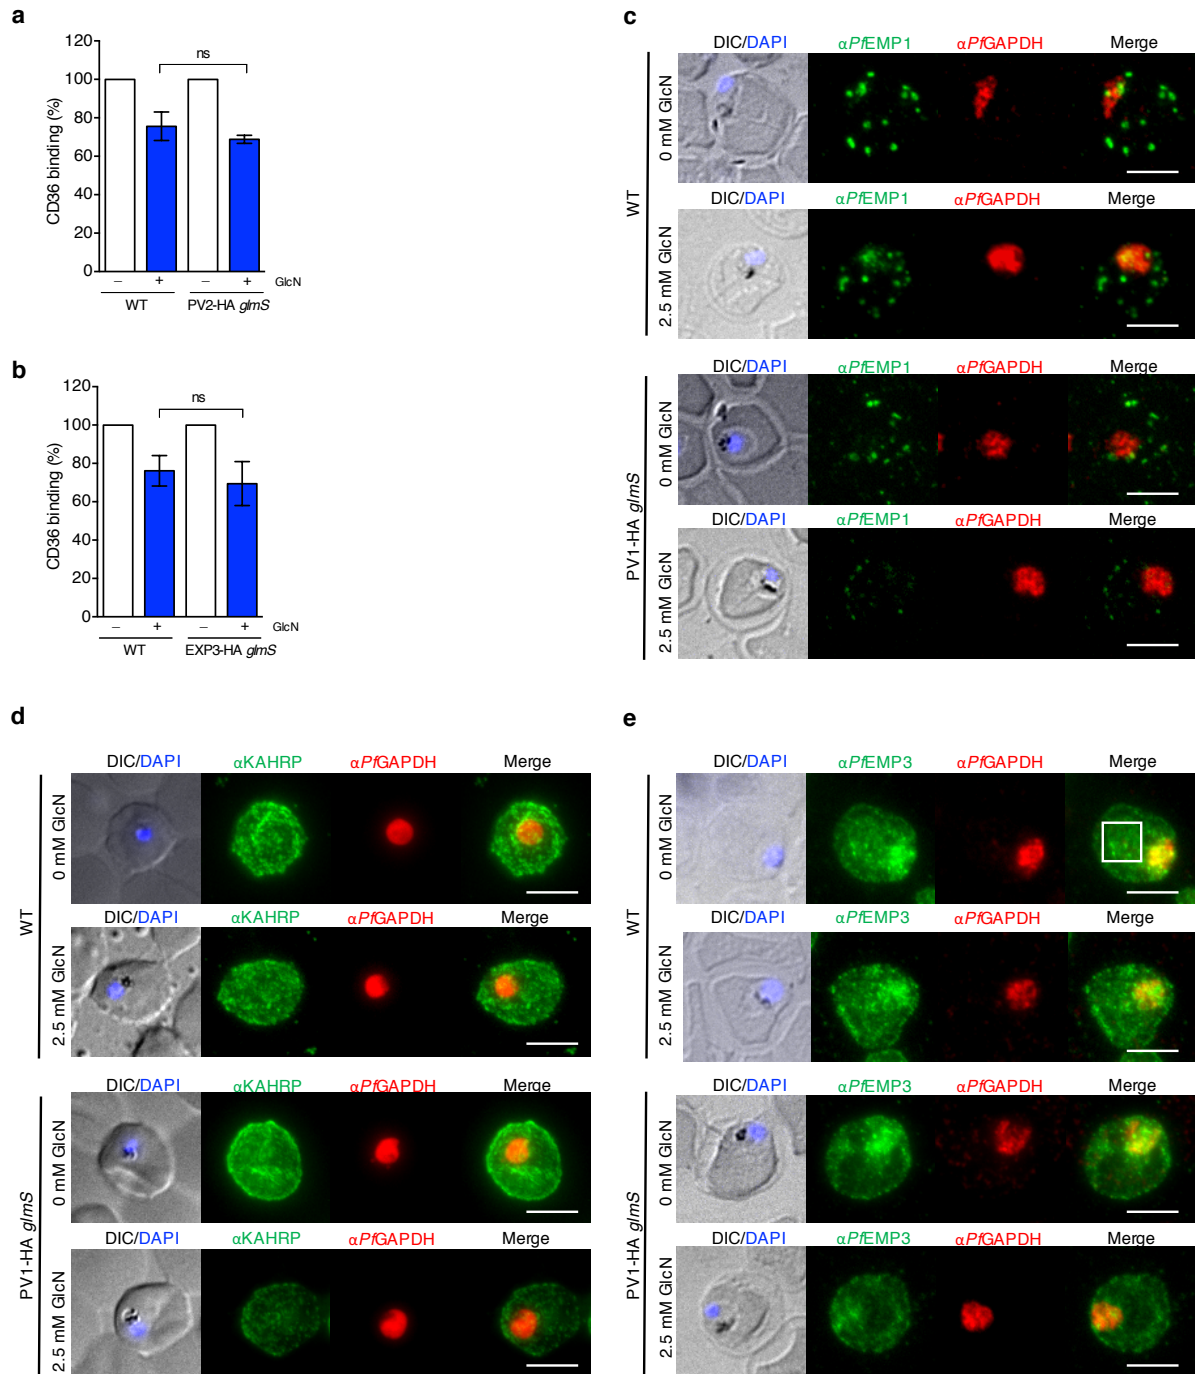

### Supplementary Figure 9 | Effects of EPIC protein knockdown on protein export and cell properties in PV1-HA, PV2-HA and EXP3-HA *glmS* infected RBCs

(a,b) Adherence of wildtype (WT; A4), PV2-HA and EXP3-HA *glmS* infected RBCs (30-32 h.p.i.) to recombinant CD36 under flow conditions (0.1 Pa) measured in 10 pre-determined fields (binding indicates % of non-treated control + S.E.M.). GlcN treatment of the A4 line causes a modest decrease in adhesion, but there is no significant difference between the GlcN-treated parent and the transfectants (PV2  $n = 3$ ,  $p = 0.425$ , unpaired  $t$ -test; EXP3  $n = 3$ ,  $p = 0.659$ , unpaired  $t$ -test). (c-e) Immunofluorescence analysis of WT (3D7) and PV1-HA *glmS*-infected RBCs at 23-26 h.p.i. following treatment with or without 2.5 mM GlcN. Parasites were labelled with (c) anti-*PfEMP1*, (d) anti-KAHRP and (e) anti-*PfEMP3* (green) and anti-*PfGAPDH* (red) antisera. DIC and DAPI (blue) are shown on the left. Fluorescence

quantitation was performed on the whole cell for *Pf*EMP1 and KAHRP and in a region in the host cytoplasm for *Pf*EMP3 (as indicated by the box). Scale bars = 5  $\mu$ m.

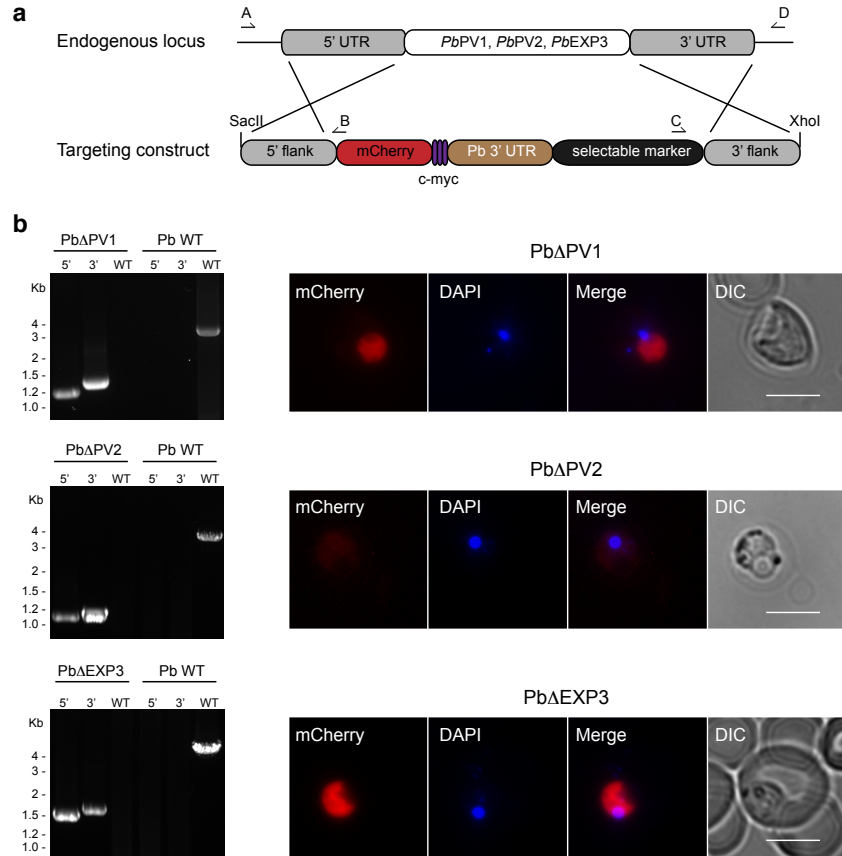

### Supplementary Figure 10 | Generation of *P. berghei* EPIC component knockout parasites

(a) Schematic of targeting construct used to generate *PbΔPV1*, *PbΔPV2* and *PbΔEXP3*. Integration results in replacement of the gene with the vector backbone containing mCherry, 3Myc (3x c-Myc tag), a non-endogenous 3'UTR, and *TgDHFR-TS* (*Toxoplasma gondii* dihydrofolate reductase-thymidylate synthase) as the selectable marker. (b) Diagnostic PCR analysis of *PbANKA* (wildtype) and *PbΔPV1*, *PbΔPV2* and *PbΔEXP3* parasites using oligonucleotides targeting sites A, B, C and D. Oligonucleotide pair A/B amplifies the 5' transgenic locus (5'), oligonucleotide pair C/D amplifies the 3' transgenic locus (3') whilst oligonucleotide pair A/D amplifies the endogenous locus (WT). DNA size is shown in kbp. (c) Live cell imaging of *PbΔPV1*, *PbΔPV2* and *PbΔEXP3* infected RBCs showing mCherry (red) fluorescence. DAPI (blue) and DIC are shown. Scale bars = 5 μm.

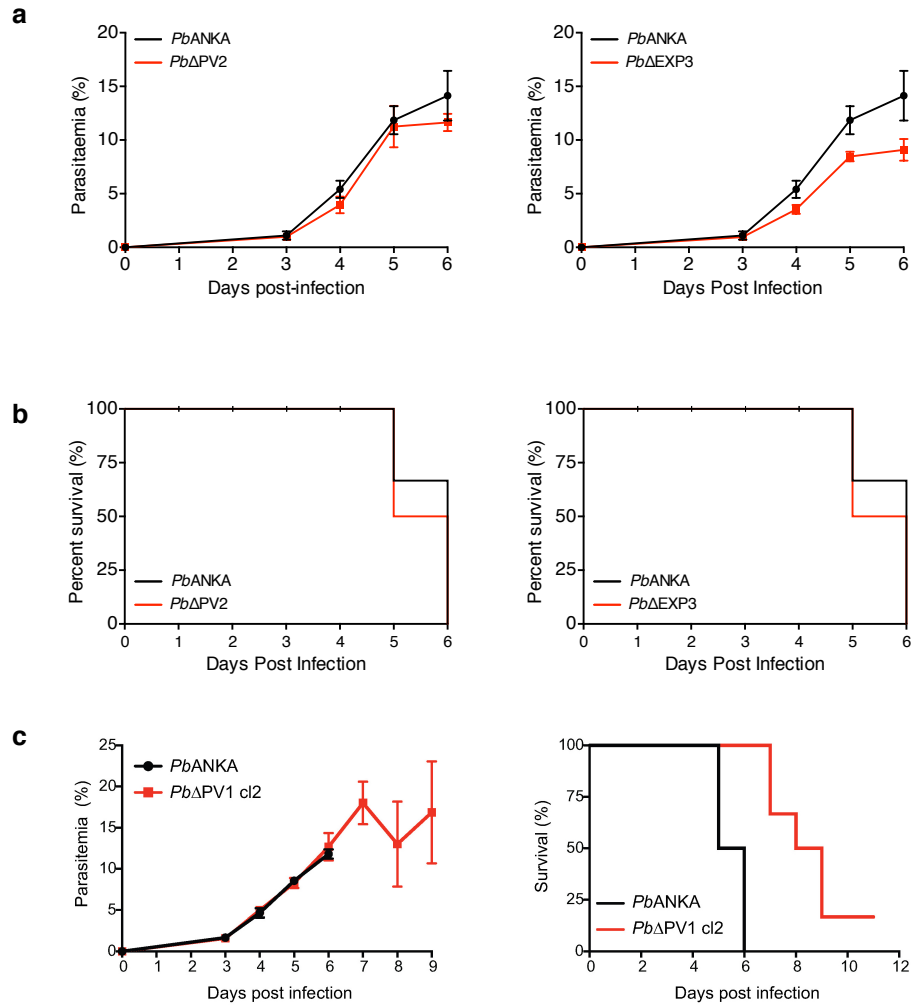

**Supplementary Figure 11 | Genetic disruption of PV1 does, but PV2 and EXP3 does not, affect virulence of *P. berghei* infections**

**(a)** Parasitaemia and **(b)** survival curves of C57/BL6 mice ( $n = 6$  *PbANKA*, *PbΔPV2*, *PbΔEXP3*) after intraperitoneal administration of  $1 \times 10^6$  *PbANKA*, *PbΔPV2* or *PbΔEXP3* parasites. **(a)** No significant difference in parasitaemia after infection with *PbANKA* and *PbΔPV2* or *PbΔEXP3* parasites was observed using an unpaired *t*-test **(b)** Survival of *PbΔPV2* and *PbΔEXP3* infected mice was similar to wildtype *PbANKA* infected mice as determined by log-rank test. Death indicates mice succumbing to cerebral malaria. **(c)** Second experiment showing survival of *PbΔPV1* infected mice ( $n=6$ ) was increased in comparison with *PbANKA* infected mice ( $n=6$ ;  $p < 0.0001$ , log-rank (Mantel-Cox) test). Death indicates mice succumbing to cerebral malaria.

## Supplementary Figure 12 | Full length Western blots

**Figure 1d**

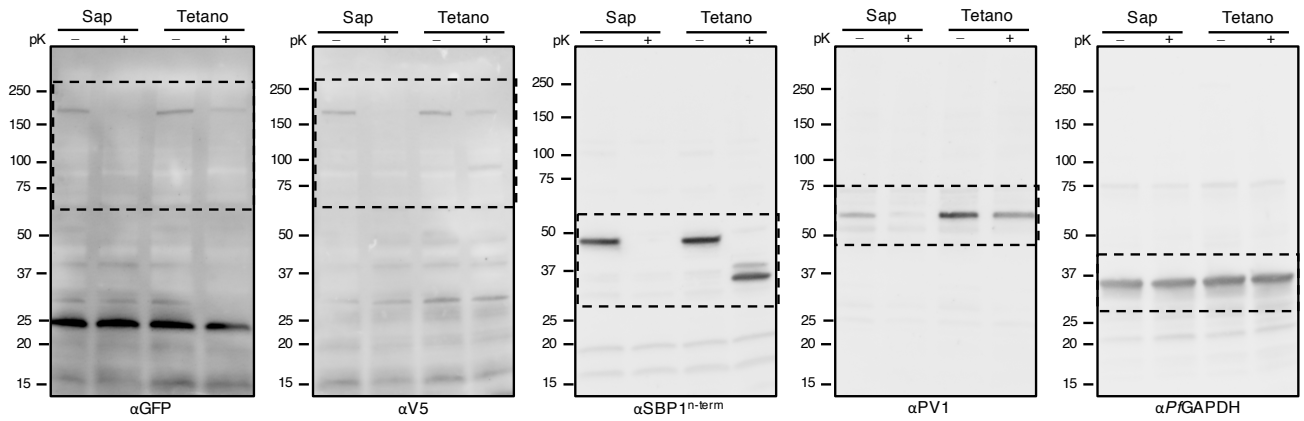

**Figure 2c**

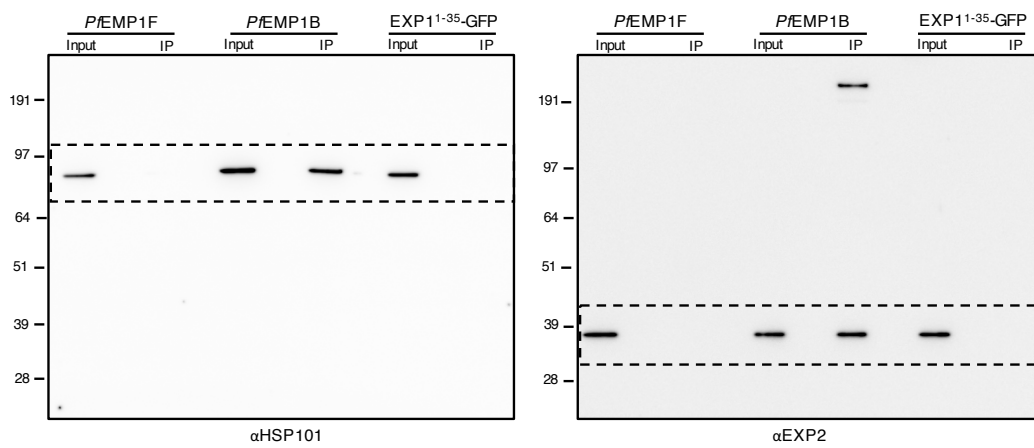

**Figure 2d**

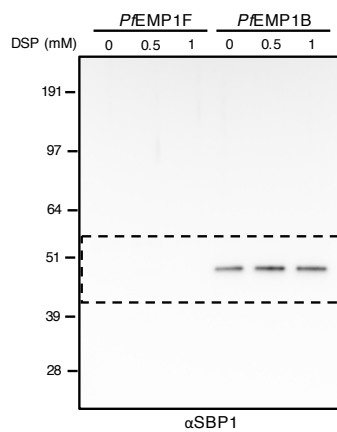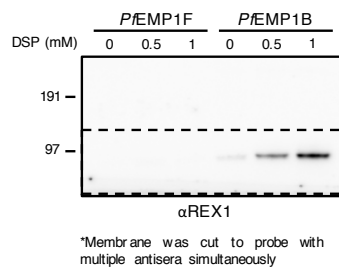

\*Membrane was cut to probe with multiple antisera simultaneously

**Figure 2e**

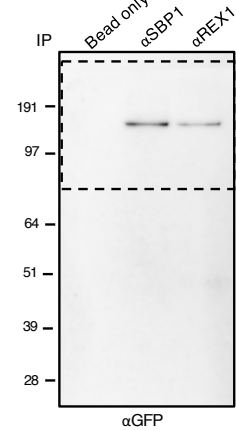



**Figure 5a**

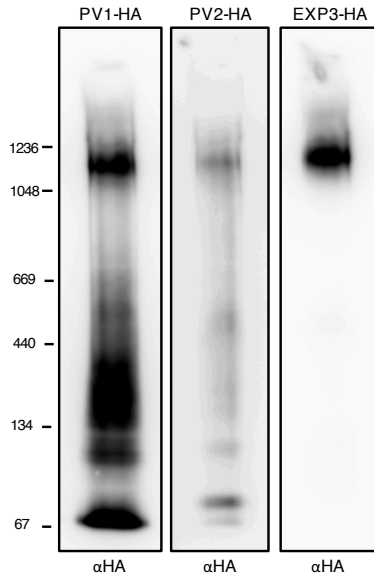

**Figure 5b**

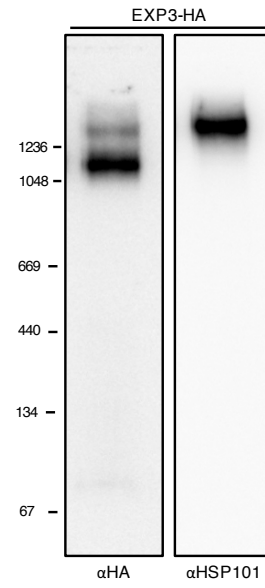

**Figure 5d**

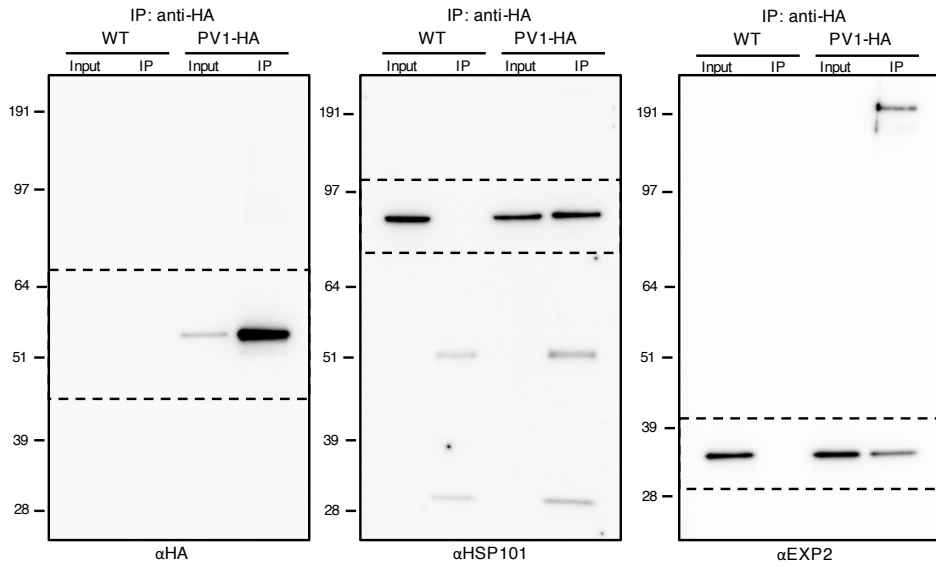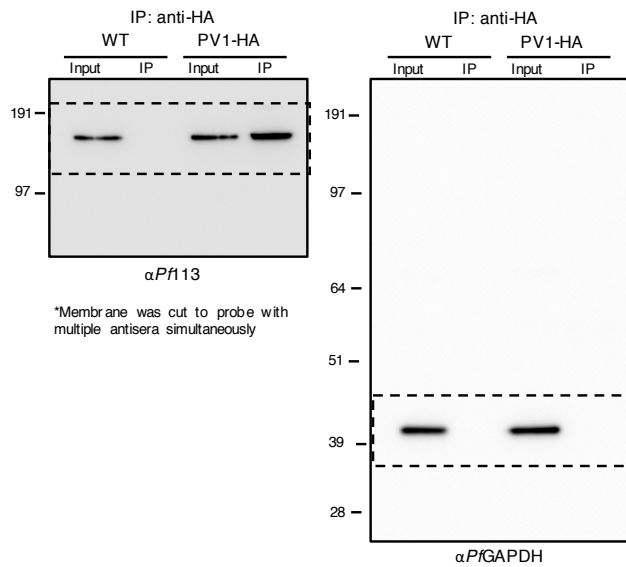

**Figure 5e**

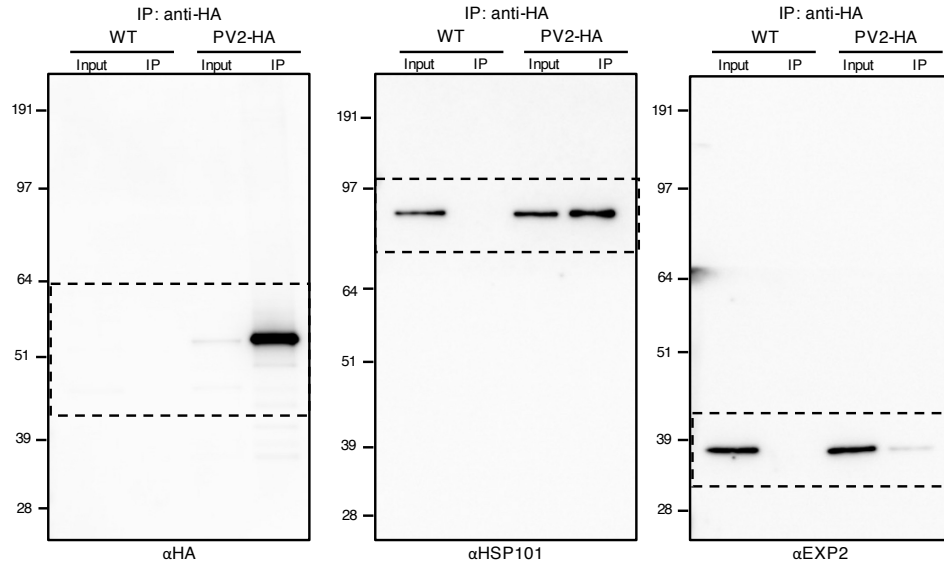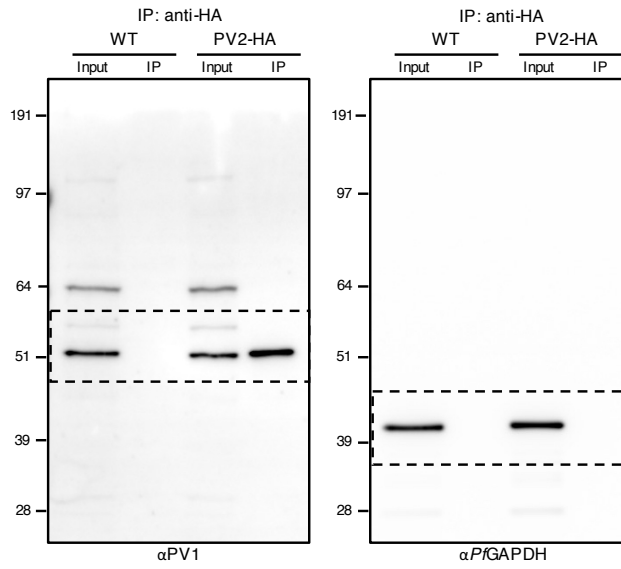

**Figure 5f**

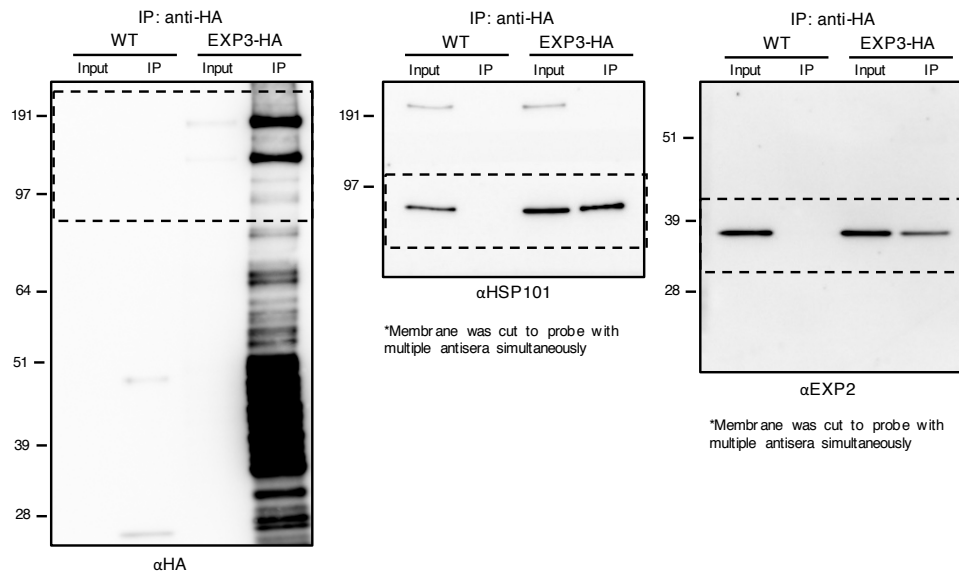

Figure 5f contd.

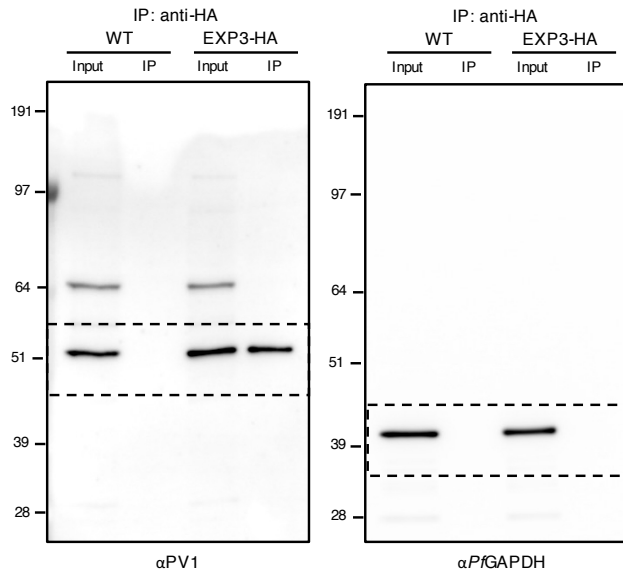

Figure 6e

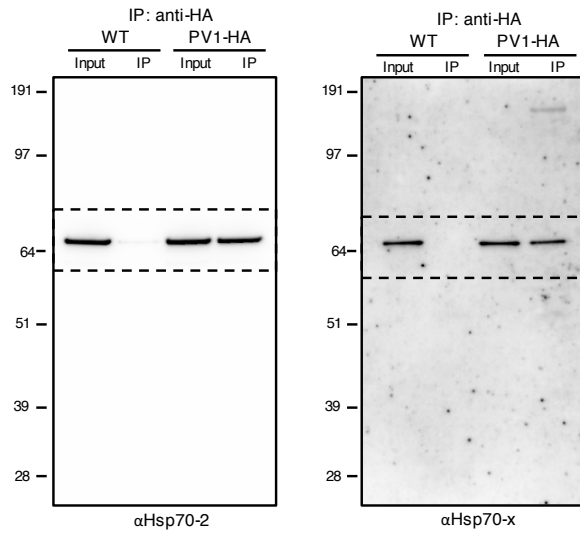

Figure 7a

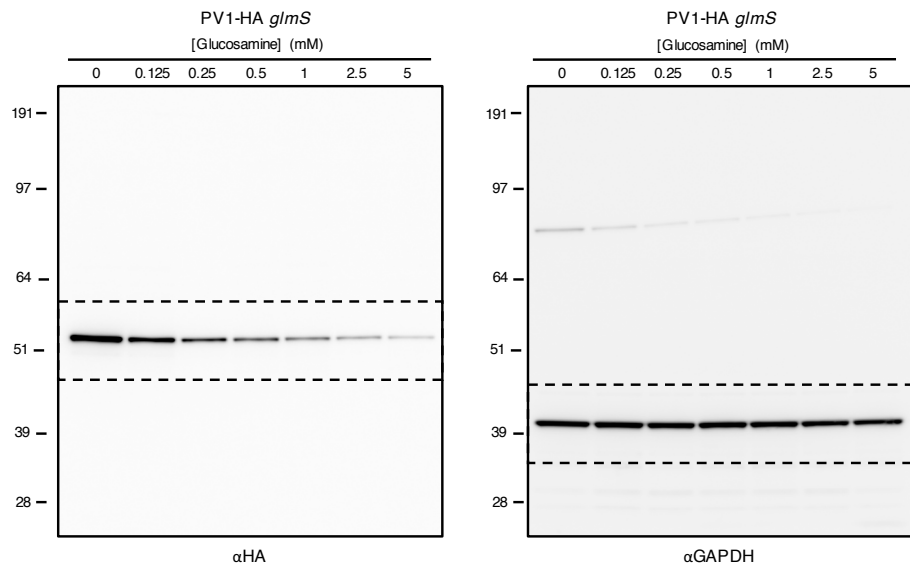

| Gene ID                           | Annotation                                                       | Number of significant ms/ms spectra |              |                 |              |                 |              |                 |              | Avg. fold change |
|-----------------------------------|------------------------------------------------------------------|-------------------------------------|--------------|-----------------|--------------|-----------------|--------------|-----------------|--------------|------------------|
|                                   |                                                                  | Experiment 1                        |              |                 |              | Experiment 2    |              |                 |              |                  |
|                                   |                                                                  | <i>Pf</i> EMP1B                     |              | <i>Pf</i> EMP1F |              | <i>Pf</i> EMP1B |              | <i>Pf</i> EMP1F |              |                  |
|                                   |                                                                  | 1                                   | 2            | 1               | 2            | 1               | 2            | 1               | 2            |                  |
| -                                 | <i>Pf</i> EMP1B                                                  | 203                                 | 192          | 0               | 0            | 179             | 210          | 0               | 0            | >196             |
| -                                 | <i>Pf</i> EMP1F                                                  | 0                                   | 0            | 123             | 188          | 0               | 0            | 99              | 83           | >123.25          |
| PF3D7_1024800                     | conserved Plasmodium protein, unknown function                   | 18                                  | 22           | 0               | 0            | 29              | 36           | 0               | 0            | >26.25           |
| PF3D7_1116800                     | heat shock protein 101 (HSP101)                                  | 6                                   | 4            | 0               | 0            | 28              | 34           | 1               | 1            | >18              |
| PF3D7_1222300                     | endoplasmic, putative (GRP94)                                    | 10                                  | 10           | 0               | 0            | 18              | 17           | 0               | 0            | >13.75           |
| PF3D7_1436300                     | translocon component PTEX150 (PTEX150)                           | 8                                   | 6            | 0               | 0            | 14              | 19           | 0               | 0            | >11.75           |
| PF3D7_1129100                     | parasitophorous vacuolar protein 1 (PV1)                         | 29                                  | 29           | 3               | 5            | 38              | 44           | 4               | 2            | 10               |
| PF3D7_0629200                     | DnaJ protein, putative                                           | 2                                   | 4            | 1               | 1            | 12              | 15           | 1               | 0            | >8.25            |
| PF3D7_0721100                     | conserved Plasmodium protein, unknown function                   | 8                                   | 4            | 0               | 0            | 9               | 9            | 0               | 0            | >7.5             |
| PF3D7_1318800                     | secretory complex protein 63 (SEC63)                             | 17                                  | 12           | 2               | 2            | 13              | 17           | 2               | 2            | 7.375            |
| PF3D7_1344200                     | heat shock protein 110, putative (HSP110)                        | 3                                   | 2            | 0               | 0            | 8               | 10           | 0               | 0            | >5.75            |
| PF3D7_1439800                     | vesicle-associated membrane protein, putative                    | 9                                   | 8            | 2               | 2            | 8               | 8            | 2               | 0            | 5.5              |
| PF3D7_1105600                     | translocon component PTEX88 (PTEX88)                             | 3                                   | 2            | 0               | 0            | 7               | 9            | 0               | 0            | >5.25            |
| PF3D7_1010700                     | dolichyl-phosphate-mannose protein mannosyltransferase, putative | 5                                   | 5            | 0               | 0            | 4               | 4            | 0               | 0            | >4.5             |
| PF3D7_0936300                     | ring-exported protein 3 (REX3)                                   | 4                                   | 2            | 0               | 0            | 3               | 7            | 0               | 0            | >4               |
| PF3D7_1016400                     | serine/threonine protein kinase, FIKK family (FIKK 10.1)         | 3                                   | 1            | 0               | 0            | 4               | 6            | 0               | 0            | >3.5             |
| PF3D7_1438100                     | secretory complex protein 62 (SEC62)                             | 3                                   | 6            | 0               | 0            | 3               | 2            | 0               | 0            | >3.5             |
| PF3D7_1404900                     | conserved Plasmodium protein, unknown function                   | 2                                   | 1            | 0               | 0            | 4               | 5            | 0               | 0            | >3               |
| PF3D7_1108700                     | heat shock protein DnaJ homologue, Pfj2                          | 0                                   | 0            | 0               | 0            | 3               | 6            | 0               | 0            | >2.25            |
| PF3D7_0501200                     | parasite-infected erythrocyte surface protein 2 (PIESP2)         | 1                                   | 1            | 0               | 0            | 3               | 3            | 0               | 0            | >2               |
| PF3D7_1226900                     | conserved Plasmodium protein, unknown function                   | 1                                   | 1            | 0               | 0            | 3               | 3            | 0               | 0            | >2               |
| PF3D7_1135400                     | conserved Plasmodium protein, unknown function                   | 1                                   | 0            | 0               | 0            | 2               | 5            | 0               | 0            | >2               |
| PF3D7_1311800                     | M1-family alanyl aminopeptidase (M1AAP)                          | 1                                   | 1            | 0               | 0            | 2               | 4            | 0               | 0            | >2               |
| PF3D7_0501300                     | skeleton-binding protein 1 (SBP1)                                | 2                                   | 1            | 0               | 0            | 3               | 2            | 0               | 0            | >2               |
| PF3D7_0716300                     | conserved Plasmodium protein, unknown function                   | 1                                   | 4            | 0               | 0            | 2               | 1            | 0               | 0            | >2               |
| PF3D7_0112800                     | Pfmc-2TM Maurer's cleft two transmembrane protein                | 2                                   | 1            | 0               | 0            | 3               | 1            | 0               | 0            | >1.75            |
| PF3D7_0935900                     | ring-exported protein 1 (REX1)                                   | 0                                   | 0            | 0               | 0            | 3               | 4            | 0               | 0            | >1.75            |
| PF3D7_1471100                     | exported protein 2 (EXP2)                                        | 0                                   | 0            | 0               | 0            | 2               | 3            | 0               | 0            | >1.25            |
| PF3D7_0925900                     | conserved Plasmodium protein, unknown function                   | 0                                   | 0            | 0               | 0            | 3               | 2            | 0               | 0            | >1.25            |
| PF3D7_0928600                     | conserved Plasmodium protein, unknown function                   | 0                                   | 0            | 0               | 0            | 2               | 3            | 0               | 0            | >1.25            |
| PF3D7_1345100                     | thioredoxin 2 (TRX2)                                             | 1                                   | 0            | 0               | 0            | 2               | 2            | 0               | 0            | >1.25            |
| PF3D7_1370300                     | membrane associated histidine-rich protein 1 (MAHRP1)            | 1                                   | 1            | 0               | 0            | 1               | 2            | 0               | 0            | >1.25            |
| PF3D7_1108600                     | endoplasmic reticulum-resident calcium binding protein (ERC)     | 1                                   | 1            | 0               | 0            | 2               | 1            | 0               | 0            | >1.25            |
| PF3D7_1320000                     | rhostry protein 2, putative (PRP2)                               | 0                                   | 1            | 0               | 0            | 1               | 2            | 0               | 0            | >1               |
| PF3D7_1002100                     | EMP1-trafficking protein 5 (PTP5)                                | 0                                   | 0            | 0               | 0            | 3               | 1            | 0               | 0            | >1               |
| PF3D7_0831400                     | Plasmodium exported protein, unknown function                    | 0                                   | 0            | 0               | 0            | 2               | 2            | 0               | 0            | >1               |
| PF3D7_1353200                     | membrane associated histidine-rich protein 2 (MAHRP2)            | 0                                   | 0            | 0               | 0            | 2               | 2            | 0               | 0            | >1               |
| PF3D7_1134100                     | protein disulfide isomerase (PDI-11)                             | 0                                   | 0            | 0               | 0            | 2               | 1            | 0               | 0            | >0.75            |
| PF3D7_1239700                     | cell division protein FtsH, putative                             | 0                                   | 0            | 0               | 0            | 1               | 2            | 0               | 0            | >0.75            |
| PF3D7_1033200                     | early transcribed membrane protein 10.2 (ETAMP 10.2)             | 0                                   | 0            | 0               | 0            | 0               | 2            | 0               | 0            | >0.5             |
| <b>False discovery rate (FDR)</b> |                                                                  | <b>0.46%</b>                        | <b>0.26%</b> | <b>0.11%</b>    | <b>1.06%</b> | <b>0.91%</b>    | <b>0.75%</b> | <b>0.83%</b>    | <b>0.88%</b> |                  |

**Supplementary Table 1 | Mass spectrometry analysis of *PfEMP1B* parasite interacting proteins**

Parasite proteins that are unique to, or  $\geq 5$ -fold enriched in, *PfEMP1B* co-IP compared to control *PfEMP1F*. PlasmoDB gene ID, protein name and number of peptides detected in two independent experiments are shown.

| Gene ID                           | Annotation                                      | Number of significant ms/ms spectra |              |                 |              |                 |              |                 |              | Avg. fold change |
|-----------------------------------|-------------------------------------------------|-------------------------------------|--------------|-----------------|--------------|-----------------|--------------|-----------------|--------------|------------------|
|                                   |                                                 | Experiment 1                        |              |                 |              | Experiment 2    |              |                 |              |                  |
|                                   |                                                 | <i>Pf</i> EMP1B                     |              | <i>Pf</i> EMP1F |              | <i>Pf</i> EMP1B |              | <i>Pf</i> EMP1F |              |                  |
|                                   |                                                 | 1                                   | 2            | 1               | 2            | 1               | 2            | 1               | 2            |                  |
| TCPA_HUMAN                        | T-complex protein 1 subunit alpha               | 3                                   | 3            | 0               | 0            | 14              | 15           | 0               | 0            | >8.75            |
| TCPG_HUMAN                        | T-complex protein 1 subunit gamma               | 5                                   | 8            | 0               | 0            | 12              | 10           | 0               | 0            | >8.75            |
| TCPQ_HUMAN                        | T-complex protein 1 subunit theta               | 4                                   | 4            | 0               | 0            | 14              | 12           | 0               | 0            | >8.5             |
| TCPB_HUMAN                        | T-complex protein 1 subunit beta                | 1                                   | 0            | 0               | 0            | 13              | 13           | 0               | 0            | >6.75            |
| TCPZ_HUMAN                        | T-complex protein 1 subunit zeta                | 1                                   | 1            | 0               | 0            | 12              | 12           | 0               | 0            | >6.5             |
| TCPD_HUMAN                        | T-complex protein 1 subunit delta               | 3                                   | 2            | 0               | 0            | 9               | 7            | 0               | 0            | >5.25            |
| TCPH_HUMAN                        | T-complex protein 1 subunit eta                 | 1                                   | 2            | 0               | 0            | 7               | 9            | 0               | 0            | >4.75            |
| TCPE_HUMAN                        | T-complex protein 1 subunit epsilon             | 1                                   | 3            | 0               | 0            | 7               | 7            | 0               | 0            | >4.5             |
| HS90A_HUMAN                       | Heat shock protein HSP90 alpha                  | 0                                   | 2            | 0               | 0            | 5               | 5            | 0               | 0            | >3               |
| PRS6A_HUMAN                       | 26S protease regulatory subunit 6A              | 0                                   | 1            | 0               | 0            | 4               | 6            | 0               | 0            | >2.75            |
| PRS10_HUMAN                       | 26S protease regulatory subunit 10B             | 1                                   | 1            | 0               | 0            | 5               | 4            | 0               | 0            | >2.75            |
| PRS7_HUMAN                        | 26S protease regulatory subunit 7               | 1                                   | 1            | 0               | 0            | 4               | 4            | 0               | 0            | >2.5             |
| PSMD2_HUMAN                       | 26S proteasome non-ATPase regulatory subunit 2  | 0                                   | 0            | 0               | 0            | 4               | 6            | 0               | 0            | >2.5             |
| CAH2_HUMAN                        | Carbonic anhydrase 2                            | 0                                   | 0            | 0               | 0            | 3               | 3            | 0               | 0            | >1.5             |
| PSDE_HUMAN                        | 26S proteasome non-ATPase regulatory subunit 14 | 1                                   | 0            | 0               | 0            | 3               | 2            | 0               | 0            | >1.5             |
| KT3K_HUMAN                        | Ketosamine-3-kinase                             | 1                                   | 1            | 0               | 0            | 2               | 2            | 0               | 0            | >1.5             |
| PRS4_HUMAN                        | 26S protease regulatory subunit 4               | 0                                   | 0            | 0               | 0            | 4               | 1            | 0               | 0            | >1.25            |
| PSD12_HUMAN                       | 26S proteasome non-ATPase regulatory subunit 12 | 0                                   | 0            | 0               | 0            | 2               | 3            | 0               | 0            | >1.25            |
| DDI2_HUMAN                        | Protein DDI1 homolog 2                          | 1                                   | 0            | 0               | 0            | 1               | 3            | 0               | 0            | >1.25            |
| PRS6B_HUMAN                       | 26S protease regulatory subunit 6B              | 0                                   | 0            | 0               | 0            | 3               | 2            | 0               | 0            | >1.25            |
| PSD11_HUMAN                       | 26S proteasome non-ATPase regulatory subunit 11 | 0                                   | 0            | 0               | 0            | 2               | 2            | 0               | 0            | >1               |
| PSMD3_HUMAN                       | 26S proteasome non-ATPase regulatory subunit 3  | 0                                   | 0            | 0               | 0            | 2               | 2            | 0               | 0            | >1               |
| DNPEP_HUMAN                       | Aspartyl aminopeptidase                         | 0                                   | 0            | 0               | 0            | 2               | 2            | 0               | 0            | >1               |
| H3BTE6_HUMAN                      | Erythrocyte membrane protein band 4.2           | 0                                   | 0            | 0               | 0            | 1               | 2            | 0               | 0            | >0.75            |
| K2C8_HUMAN                        | Keratin, type II cytoskeletal 8                 | 0                                   | 0            | 0               | 0            | 2               | 1            | 0               | 0            | >0.75            |
| RPIA_HUMAN                        | Ribose-5-phosphate isomerase                    | 0                                   | 0            | 0               | 0            | 2               | 0            | 0               | 0            | >0.5             |
| <b>False discovery rate (FDR)</b> |                                                 | <b>0.46%</b>                        | <b>0.26%</b> | <b>0.11%</b>    | <b>1.06%</b> | <b>0.91%</b>    | <b>0.75%</b> | <b>0.83%</b>    | <b>0.88%</b> |                  |

### Supplementary Table 2 | Mass spectrometry analysis of *Pf*EMP1B human interacting proteins

Human proteins that are unique to, or  $\geq 5$ -fold enriched in, *Pf*EMP1B co-IP compared to control *Pf*EMP1F. UniProt gene ID, protein name and number of peptides detected in two independent experiments are shown.

| Gene ID       | Annotation                                                | Number of significant ms/ms spectra |     |    |   |              |     |    |   | Avg. fold change |
|---------------|-----------------------------------------------------------|-------------------------------------|-----|----|---|--------------|-----|----|---|------------------|
|               |                                                           | Experiment 1                        |     |    |   | Experiment 2 |     |    |   |                  |
|               |                                                           | PV1-HA                              |     | WT |   | PV1-HA       |     | WT |   |                  |
|               |                                                           | 1                                   | 2   | 1  | 2 | 1            | 2   | 1  | 2 |                  |
| PF3D7_1129100 | parasitophorous vacuolar protein 1 (PV1)                  | 97                                  | 120 | 0  | 0 | 94           | 105 | 0  | 0 | >104             |
| PF3D7_1024800 | exported protein 3 (EXP3)                                 | 90                                  | 107 | 0  | 0 | 68           | 77  | 0  | 0 | >85.5            |
| PF3D7_0917900 | heat shock protein 70 (HSP70-2)                           | 60                                  | 64  | 0  | 0 | 84           | 83  | 0  | 0 | >72.75           |
| PF3D7_1222300 | endoplasmic, putative (GRP94)                             | 24                                  | 27  | 0  | 0 | 33           | 34  | 0  | 0 | >29.5            |
| PF3D7_1436300 | translocon component PTEX150 (PTEX150)                    | 36                                  | 32  | 0  | 0 | 22           | 26  | 0  | 0 | >29              |
| PF3D7_0831700 | heat shock protein 70 (HSP70-x)                           | 27                                  | 31  | 0  | 0 | 16           | 17  | 0  | 0 | >22.75           |
| PF3D7_1116800 | heat shock protein 101 (HSP101)                           | 20                                  | 27  | 0  | 0 | 22           | 21  | 0  | 0 | >22.5            |
| PF3D7_1420700 | surface protein Pf113 (Pf113)                             | 21                                  | 18  | 0  | 0 | 12           | 18  | 0  | 0 | >17.25           |
| PF3D7_0827900 | protein disulfide isomerase (PDI8)                        | 7                                   | 4   | 0  | 0 | 25           | 24  | 0  | 0 | >15              |
| PF3D7_1226900 | parasitophorous vacuolar protein 2 (PV2)                  | 13                                  | 15  | 0  | 0 | 10           | 12  | 0  | 0 | >12.5            |
| PF3D7_1464600 | phosphatase, putative                                     | 11                                  | 9   | 0  | 0 | 13           | 15  | 0  | 0 | >12              |
| PF3D7_1228600 | merozoite surface protein 9 (MSP9)                        | 13                                  | 14  | 0  | 0 | 8            | 5   | 0  | 0 | >10              |
| PF3D7_1454400 | aminopeptidase P (APP)                                    | 9                                   | 13  | 1  | 1 | 7            | 7   | 1  | 1 | 9                |
| PF3D7_0930300 | merozoite surface protein 1 (MSP1)                        | 12                                  | 12  | 0  | 0 | 2            | 3   | 0  | 0 | >7.25            |
| PF3D7_1105600 | translocon component PTEX88 (PTEX88)                      | 10                                  | 11  | 0  | 0 | 2            | 2   | 0  | 0 | >6.25            |
| PF3D7_0902800 | serine repeat antigen 9 (SERA9)                           | 9                                   | 12  | 0  | 0 | 0            | 0   | 0  | 0 | >5.25            |
| PF3D7_1033200 | early transcribed membrane protein 10.2 (ETRAMP 10.2)     | 4                                   | 7   | 0  | 0 | 3            | 6   | 0  | 0 | >5               |
| PF3D7_0721100 | conserved Plasmodium protein, unknown function            | 8                                   | 7   | 0  | 0 | 3            | 2   | 0  | 0 | >5               |
| PF3D7_0929400 | high molecular weight rophtry protein 2 (RhopH2)          | 2                                   | 2   | 0  | 0 | 11           | 5   | 0  | 0 | >5               |
| PF3D7_1016300 | glycophorin binding protein (GBP)                         | 5                                   | 9   | 0  | 0 | 3            | 2   | 0  | 0 | >4.75            |
| PF3D7_0207600 | serine repeat antigen 5 (SERA5)                           | 7                                   | 8   | 0  | 0 | 2            | 2   | 0  | 0 | >4.75            |
| PF3D7_1311800 | M1-family alanyl aminopeptidase (M1AAP)                   | 8                                   | 5   | 0  | 0 | 2            | 4   | 0  | 0 | >4.75            |
| PF3D7_0104200 | STAR-related lipid transfer protein                       | 6                                   | 6   | 0  | 0 | 4            | 2   | 0  | 0 | >4.5             |
| PF3D7_1471100 | exported protein 2 (EXP2)                                 | 4                                   | 7   | 0  | 0 | 3            | 4   | 0  | 0 | >4.5             |
| PF3D7_1116700 | cathepsin C, homolog, dipeptidyl aminopeptidase 1 (DPAP1) | 7                                   | 6   | 0  | 0 | 4            | 1   | 0  | 0 | >4.5             |
| PF3D7_0730900 | EMP1-trafficking protein (PTP4)                           | 2                                   | 2   | 0  | 0 | 4            | 7   | 0  | 0 | >3.75            |
| PF3D7_0406200 | sexual stage-specific protein precursor (Pfs16)           | 3                                   | 5   | 0  | 0 | 2            | 2   | 0  | 0 | >3               |
| PF3D7_0716300 | conserved Plasmodium protein, unknown function            | 4                                   | 4   | 0  | 0 | 2            | 1   | 0  | 0 | >2.75            |
| PF3D7_0501200 | parasite-infected erythrocyte surface protein 2 (PIESP2)  | 3                                   | 4   | 0  | 0 | 2            | 1   | 0  | 0 | >2.5             |
| PF3D7_1016400 | serine/threonine protein kinase, FIKK family (FIKK 10.1)  | 2                                   | 4   | 0  | 0 | 2            | 2   | 0  | 0 | >2.5             |
| PF3D7_0112200 | multidrug resistance-associated protein 1 (MRP1)          | 5                                   | 5   | 0  | 0 | 0            | 0   | 0  | 0 | >2.5             |
| PF3D7_1104400 | conserved Plasmodium protein, unknown function            | 2                                   | 2   | 0  | 0 | 4            | 2   | 0  | 0 | >2.5             |
| PF3D7_0215000 | acyl-CoA synthetase (ACS9)                                | 4                                   | 5   | 0  | 0 | 0            | 0   | 0  | 0 | >2.25            |
| PF3D7_0532100 | early transcribed membrane protein 5 (ETRAMP5)            | 3                                   | 3   | 0  | 0 | 2            | 1   | 0  | 0 | >2.25            |
| PF3D7_0532400 | lysine-rich membrane-associated PHISTb protein (LyMP)     | 3                                   | 3   | 0  | 0 | 1            | 2   | 0  | 0 | >2.25            |
| PF3D7_1462300 | conserved Plasmodium protein, unknown function            | 2                                   | 1   | 0  | 0 | 3            | 3   | 0  | 0 | >2.25            |
| PF3D7_1135400 | conserved Plasmodium protein, unknown function            | 2                                   | 3   | 0  | 0 | 2            | 1   | 0  | 0 | >2               |
| PF3D7_1334500 | MSP7-like protein (MSRP6)                                 | 3                                   | 4   | 0  | 0 | 0            | 0   | 0  | 0 | >1.75            |
| PF3D7_0207800 | serine repeat antigen 3 (SERA3)                           | 3                                   | 4   | 0  | 0 | 0            | 0   | 0  | 0 | >1.75            |
| PF3D7_0905400 | high molecular weight rophtry protein 3 (RhopH3)          | 2                                   | 3   | 0  | 0 | 1            | 1   | 0  | 0 | >1.75            |
| PF3D7_1001500 | early transcribed membrane protein 10.1 (ETRAMP10.1)      | 1                                   | 1   | 0  | 0 | 2            | 3   | 0  | 0 | >1.75            |
| PF3D7_1252700 | Plasmodium exported protein (PHISTb), unknown function    | 3                                   | 2   | 0  | 0 | 1            | 1   | 0  | 0 | >1.75            |
| PF3D7_1408000 | plasmepsin II                                             | 3                                   | 3   | 0  | 0 | 0            | 0   | 0  | 0 | >1.5             |
| PF3D7_0829200 | prohibitin, putative                                      | 3                                   | 3   | 0  | 0 | 0            | 0   | 0  | 0 | >1.5             |

|                                   |                                                             |              |              |              |              |              |              |              |              |       |
|-----------------------------------|-------------------------------------------------------------|--------------|--------------|--------------|--------------|--------------|--------------|--------------|--------------|-------|
| PF3D7_0925900                     | conserved Plasmodium protein, unknown function              | 2            | 2            | 0            | 0            | 0            | 1            | 0            | 0            | >1.25 |
| PF3D7_1419200                     | thioredoxin-like protein, putative                          | 2            | 1            | 0            | 0            | 1            | 1            | 0            | 0            | >1.25 |
| PF3D7_0936000                     | ring-exported protein 2 (REX2)                              | 1            | 2            | 0            | 0            | 1            | 1            | 0            | 0            | >1.25 |
| PF3D7_0830400                     | conserved Plasmodium protein, unknown function              | 1            | 2            | 0            | 0            | 1            | 1            | 0            | 0            | >1.25 |
| PF3D7_1121600                     | exported protein 1 (EXP1)                                   | 3            | 0            | 0            | 0            | 1            | 1            | 0            | 0            | >1.25 |
| PF3D7_0811600                     | conserved Plasmodium protein, unknown function              | 2            | 2            | 0            | 0            | 0            | 0            | 0            | 0            | >1    |
| PF3D7_0912400                     | alkaline phosphatase, putative                              | 2            | 2            | 0            | 0            | 0            | 0            | 0            | 0            | >1    |
| PF3D7_0500800                     | mature parasite-infected erythrocyte surface antigen (MESA) | 2            | 2            | 0            | 0            | 0            | 0            | 0            | 0            | >1    |
| PF3D7_1335100                     | merozoite surface protein 7 (MSP7)                          | 2            | 1            | 0            | 0            | 0            | 0            | 0            | 0            | >0.75 |
| PF3D7_0104500                     | conserved Plasmodium protein, unknown function              | 1            | 2            | 0            | 0            | 0            | 0            | 0            | 0            | >0.75 |
| PF3D7_0104400                     | 4-hydroxy-3-methylbut-2-enyl diphosphate reductase (LytB)   | 2            | 1            | 0            | 0            | 0            | 0            | 0            | 0            | >0.75 |
| PF3D7_1364100                     | 6-cysteine protein (P92)                                    | 1            | 2            | 0            | 0            | 0            | 0            | 0            | 0            | >0.75 |
| PF3D7_0913700                     | conserved Plasmodium protein, unknown function              | 1            | 2            | 0            | 0            | 0            | 0            | 0            | 0            | >0.75 |
| <b>False discovery rate (FDR)</b> |                                                             | <b>0.31%</b> | <b>0.63%</b> | <b>1.48%</b> | <b>0.25%</b> | <b>0.67%</b> | <b>0.90%</b> | <b>0.00%</b> | <b>0.38%</b> |       |

### Supplementary Table 3 | Mass spectrometry analysis of PV1-HA interacting proteins

Proteins that are unique to, or  $\geq 5$ -fold enriched in, PV1-HA co-IP compared to control wildtype (WT). PlasmoDB gene ID, protein name and number of peptides detected in two independent experiments are shown.



| Gene ID                           | Annotation                                               | Number of significant ms/ms spectra |              |              |              |              |              |              |              | Avg. fold change |
|-----------------------------------|----------------------------------------------------------|-------------------------------------|--------------|--------------|--------------|--------------|--------------|--------------|--------------|------------------|
|                                   |                                                          | Experiment 1                        |              |              |              | Experiment 2 |              |              |              |                  |
|                                   |                                                          | PV2                                 |              | WT           |              | PV2          |              | WT           |              |                  |
|                                   |                                                          | 1                                   | 2            | 1            | 2            | 1            | 2            | 1            | 2            |                  |
| PF3D7_1226900                     | parasitophorous vacuolar protein 2 (PV2)                 | 34                                  | 20           | 0            | 0            | 60           | 53           | 0            | 0            | >41.75           |
| PF3D7_1129100                     | parasitophorous vacuolar protein 1 (PV1)                 | 17                                  | 14           | 1            | 1            | 24           | 23           | 1            | 1            | 19.50            |
| PF3D7_1024800                     | exported protein 3 (EXP3)                                | 3                                   | 0            | 0            | 0            | 24           | 21           | 0            | 0            | >12.00           |
| PF3D7_1116800                     | heat shock protein 101 (HSP101)                          | 0                                   | 0            | 0            | 0            | 8            | 5            | 0            | 0            | >3.25            |
| PF3D7_1201000                     | Plasmodium exported protein (PHISTb), unknown function   | 2                                   | 1            | 0            | 0            | 5            | 4            | 0            | 0            | >3.00            |
| PF3D7_1228600                     | merozoite surface protein 9 (MSP9)                       | 0                                   | 0            | 0            | 0            | 4            | 3            | 0            | 0            | >1.75            |
| PF3D7_1436300                     | translocon component PTEX150 (PTEX150)                   | 0                                   | 0            | 0            | 0            | 3            | 4            | 0            | 0            | >1.75            |
| PF3D7_0501200                     | parasite-infected erythrocyte surface protein 2 (PIESP2) |                                     | 0            | 0            | 0            | 3            | 2            | 0            | 0            | >1.67            |
| PF3D7_1105600                     | translocon component PTEX88 (PTEX88)                     | 0                                   | 0            | 0            | 0            | 3            | 2            | 0            | 0            | >1.25            |
| PF3D7_1016400                     | serine/threonine protein kinase, FIKK family (FIKK 10.1) | 0                                   | 0            | 0            | 0            | 2            | 2            | 0            | 0            | >1.00            |
| PF3D7_1471100                     | exported protein 2 (EXP2)                                | 0                                   | 0            | 0            | 0            | 1            | 2            | 0            | 0            | >0.75            |
| <b>False discovery rate (FDR)</b> |                                                          | <b>0.38%</b>                        | <b>0.25%</b> | <b>0.43%</b> | <b>0.49%</b> | <b>0.92%</b> | <b>0.26%</b> | <b>0.70%</b> | <b>0.00%</b> |                  |

#### Supplementary Table 4 | Mass spectrometry analysis of PV2-HA interacting proteins

Proteins that are unique to, or  $\geq 5$ -fold enriched in, PV2-HA co-IP compared to control wildtype (WT). PlasmoDB gene ID, protein name and number of peptides detected in two independent experiments are shown

| Gene ID                           | Annotation                                                | Number of significant ms/ms spectra |              |              |              |              |              |              |              | Avg. fold change |
|-----------------------------------|-----------------------------------------------------------|-------------------------------------|--------------|--------------|--------------|--------------|--------------|--------------|--------------|------------------|
|                                   |                                                           | Experiment 1                        |              |              |              | Experiment 2 |              |              |              |                  |
|                                   |                                                           | EXP3                                |              | WT           |              | EXP3         |              | WT           |              |                  |
|                                   |                                                           | 1                                   | 2            | 1            | 2            | 1            | 2            | 1            | 2            |                  |
| PF3D7_1024800                     | exported protein 3 (EXP3)                                 | 75                                  | 60           | 0            | 0            | 84           | 118          | 0            | 0            | >84.25           |
| PF3D7_1129100                     | parasitophorous vacuolar protein 1 (PV1)                  | 27                                  | 19           | 1            | 1            | 45           | 72           | 1            | 1            | >40.75           |
| PF3D7_1436300                     | translocon component PTEX150 (PTEX150)                    | 3                                   | 1            | 0            | 0            | 12           | 20           | 0            | 0            | >9               |
| PF3D7_1226900                     | parasitophorous vacuolar protein 2 (PV2)                  | 1                                   | 1            | 0            | 0            | 12           | 14           | 0            | 0            | >7               |
| PF3D7_1116700                     | cathepsin C, homolog, dipeptidyl aminopeptidase 1 (DPAP1) | 3                                   | 3            | 1            | 0            | 6            | 10           | 1            | 0            | >5.5             |
| PF3D7_1116800                     | heat shock protein 101 (HSP101)                           | 2                                   | 2            | 0            | 0            | 7            | 10           | 0            | 0            | >5.25            |
| PF3D7_1454400                     | aminopeptidase P (APP)                                    | 0                                   | 0            | 0            | 0            | 7            | 11           | 0            | 0            | >4.5             |
| PF3D7_0902800                     | serine repeat antigen 9 (SERA9)                           | 0                                   | 0            | 0            | 0            | 6            | 6            | 0            | 0            | >3               |
| PF3D7_1016300                     | glycophorin binding protein (GBP)                         | 0                                   | 0            | 0            | 0            | 7            | 5            | 0            | 0            | >3               |
| PF3D7_1016400                     | serine/threonine protein kinase, FIKK family (FIKK 10.1)  | 1                                   | 1            | 0            | 0            | 4            | 5            | 0            | 0            | >2.75            |
| PF3D7_1105600                     | translocon component PTEX88 (PTEX88)                      | 1                                   | 0            | 0            | 0            | 3            | 6            | 0            | 0            | >2.5             |
| PF3D7_1201000                     | Plasmodium exported protein (PHISTb), unknown function    | 1                                   | 2            | 0            | 0            | 3            | 4            | 0            | 0            | >2.5             |
| PF3D7_0104200                     | StAR-related lipid transfer protein                       | 0                                   | 0            | 0            | 0            | 4            | 5            | 0            | 0            | >2.25            |
| PF3D7_0305300                     | conserved Plasmodium membrane protein, unknown function   | 2                                   | 0            | 0            | 0            | 2            | 3            | 0            | 0            | >1.75            |
| PF3D7_0501200                     | parasite-infected erythrocyte surface protein 2 (PIESP2)  | 0                                   | 0            | 0            | 0            | 3            | 3            | 0            | 0            | >1.5             |
| PF3D7_0925900                     | conserved Plasmodium protein, unknown function            | 0                                   | 0            | 0            | 0            | 3            | 3            | 0            | 0            | >1.5             |
| PF3D7_1222300                     | endoplasmic, putative (GRP94)                             | 0                                   | 0            | 0            | 0            | 3            | 3            | 0            | 0            | >1.5             |
| PF3D7_1302300                     | Plasmodium exported protein, unknown function             | 0                                   | 0            | 0            | 0            | 3            | 2            | 0            | 0            | >1.25            |
| PF3D7_0532100                     | early transcribed membrane protein 5 (ETRAMP5)            | 0                                   | 0            | 0            | 0            | 2            | 3            | 0            | 0            | >1.25            |
| PF3D7_1320000                     | rhostry protein 2, putative (PRP2)                        | 2                                   | 0            | 0            | 0            | 2            | 1            | 0            | 0            | >1.25            |
| PF3D7_1321900                     | conserved Plasmodium protein, unknown function            | 1                                   | 0            | 0            | 0            | 1            | 3            | 0            | 0            | >1.25            |
| PF3D7_1471100                     | exported protein 2 (EXP2)                                 | 0                                   | 0            | 0            | 0            | 2            | 3            | 0            | 0            | >1.25            |
| PF3D7_1228600                     | merozoite surface protein 9 (MSP9)                        | 0                                   | 0            | 0            | 0            | 2            | 2            | 0            | 0            | >1               |
| PF3D7_1420700                     | surface protein <i>Pf</i> 113 ( <i>Pf</i> 113)            | 0                                   | 0            | 0            | 0            | 1            | 3            | 0            | 0            | >1               |
| PF3D7_1451800                     | sortillin, putative                                       | 0                                   | 0            | 0            | 0            | 2            | 2            | 0            | 0            | >1               |
| PF3D7_0827900                     | protein disulfide isomerase (PDI8)                        | 0                                   | 0            | 0            | 0            | 2            | 2            | 0            | 0            | >1               |
| PF3D7_1404900                     | conserved Plasmodium protein, unknown function            | 0                                   | 0            | 0            | 0            | 2            | 2            | 0            | 0            | >1               |
| PF3D7_0721100                     | conserved Plasmodium protein, unknown function            | 0                                   | 0            | 0            | 0            | 1            | 2            | 0            | 0            | >0.75            |
| PF3D7_0406200                     | sexual stage-specific protein precursor (Pfs16)           | 0                                   | 0            | 0            | 0            | 0            | 3            | 0            | 0            | >0.75            |
| PF3D7_0830400                     | conserved Plasmodium protein, unknown function            | 0                                   | 0            | 0            | 0            | 1            | 2            | 0            | 0            | >0.75            |
| PF3D7_1334500                     | MSP7-like protein (MSRP6)                                 | 0                                   | 0            | 0            | 0            | 1            | 2            | 0            | 0            | >0.75            |
| PF3D7_0911900                     | falstatin (ICP)                                           | 0                                   | 0            | 0            | 0            | 2            | 1            | 0            | 0            | >0.75            |
| PF3D7_1135400                     | conserved Plasmodium protein, unknown function            | 0                                   | 0            | 0            | 0            | 1            | 2            | 0            | 0            | >0.75            |
| PF3D7_1464600                     | phosphatase, putative                                     | 0                                   | 0            | 0            | 0            | 2            | 1            | 0            | 0            | >0.75            |
| PF3D7_0215000                     | acyl-CoA synthetase (ACS9)                                | 0                                   | 0            | 0            | 0            | 1            | 2            | 0            | 0            | >0.75            |
| PF3D7_0207600                     | serine repeat antigen 5 (SERA5)                           | 0                                   | 0            | 0            | 0            | 1            | 2            | 0            | 0            | >0.75            |
| PF3D7_1033200                     | early transcribed membrane protein 10.2 (ETRAMP 10.2)     | 0                                   | 0            | 0            | 0            | 0            | 2            | 0            | 0            | >0.5             |
| <b>False discovery rate (FDR)</b> |                                                           | <b>0.31%</b>                        | <b>0.63%</b> | <b>1.48%</b> | <b>0.25%</b> | <b>0.67%</b> | <b>0.90%</b> | <b>0.00%</b> | <b>0.38%</b> |                  |

**Supplementary Table 5 | Mass spectrometry analysis of EXP3-HA interacting proteins**  
Proteins that are unique to, or  $\geq 5$ -fold enriched in, EXP3-HA co-IP compared to control wildtype (WT). PlasmoDB gene ID, protein name and number of peptides detected in two independent experiments are shown.

| Primer name                      | Sequence                                        |
|----------------------------------|-------------------------------------------------|
| <i>glmS</i> PV1 forward          | <b>GTCGAC</b> CCCATCTGAAAATGATTTTTTC            |
| <i>glmS</i> PV1 reverse          | <b>CTGCAG</b> GCTCGATATTGGTGTG                  |
| <i>glmS</i> PV2 forward          | <b>GTCGAC</b> GAATTTATATCAGCTCC                 |
| <i>glmS</i> PV2 reverse          | <b>CTGCAG</b> ATTTTCCGTAATATAATTTTG             |
| <i>glmS</i> EXP3 forward         | <b>GTCGAC</b> GAAGAAGAAAAAGAAGACG               |
| <i>glmS</i> EXP3 reverse         | <b>CTGCAG</b> AGAACTTAACCATGGAGC                |
| PV1 5' int. screen               | ATGATTAAAATAATATTAGCTAGC                        |
| PV2 5' int. screen               | ATGTTTATAATAAAATGCATAGTTTTTCG                   |
| EXP3 5' int. screen              | CGAAACATCTAAGATGTGAAG                           |
| CRT MAHRP1 forward               | <b>CTCGAG</b> ATGGCAGAGCAAGCAG                  |
| CRT MAHRP1 reverse               | <b>GGTACC</b> ATTATCTTTTTTTTCTTGTCTAA           |
| CRT PTP5 forward                 | <b>CTCGAG</b> ATGAAAACATAATAACAAG               |
| CRT PTP5 reverse                 | <b>GGTACC</b> TTTTAATTTCTTTTGAGATCTAC           |
| <i>PbΔ</i> PV1 5' UTR forward    | GAT <b>CCGCGG</b> GAGGCTACCAATAAATCATAATG       |
| <i>PbΔ</i> PV1 5' UTR reverse    | CAT <b>GTTAAC</b> TGCTAACGCCACCTTAATCAT         |
| <i>PbΔ</i> PV1 3' UTR forward    | GAG <b>CCTAGG</b> TGTATTTTCGCGTCTGTACATTAG      |
| <i>PbΔ</i> PV1 3' UTR reverse    | CAC <b>CTCGAG</b> GCACTACTAAATCTAGTAGATATG      |
| <i>PbΔ</i> PV2 5' UTR forward    | GAT <b>CCGCGG</b> CCTTAGTCTTAAACTTATGGC         |
| <i>PbΔ</i> PV2 5' UTR reverse    | CAT <b>GTTAAC</b> AGCCATTTTGAAAAATAGTGTGAA      |
| <i>PbΔ</i> PV2 3' UTR forward    | GAG <b>CCTAGG</b> AGTATATACACGCGCATGCAC         |
| <i>PbΔ</i> PV2 3' UTR reverse    | CAC <b>CTCGAG</b> GGACAGCAACAAAGGATATAC         |
| <i>PbΔ</i> EXP3 5' UTR forward   | GAT <b>CCGCGG</b> CCTGTGCGCAGTTTTAACACA         |
| <i>PbΔ</i> EXP3 5' UTR reverse   | CAT <b>GTTAAC</b> GAGTTTTTTCTTCAATATCATTTTATCAG |
| <i>PbΔ</i> EXP3 3' UTR forward   | GAG <b>CCTAGG</b> ACATAAAGGAACCTTACCAG          |
| <i>PbΔ</i> EXP3 3' UTR reverse   | CAC <b>CTCGAG</b> GAGCTAGCCAACAATTTACTC         |
| <i>PbΔ</i> PV1 'A' int. screen   | CGTTTCCGGTGCATCATTTATG                          |
| <i>PbΔ</i> PV1 'D' int. screen   | TGTAACACATATAAATTGTTTCAGG                       |
| <i>PbΔ</i> PV2 'A' int. screen   | TTAAGGCTGCTTTCTTTAATGTCCAT                      |
| <i>PbΔ</i> PV2 'D' int. screen   | CAAGTTGGCAACAAGGTAAATTG                         |
| <i>PbΔ</i> EXP3 'A' int. screen  | GAAAGGATACATACAATAAGGGATT                       |
| <i>PbΔ</i> EXP3 'D' int. screen  | GTAACAAAATGAGAGGAGGATTAC                        |
| <i>Pb</i> global 'B' int. screen | GCCATGTTATCCTCCTCGC                             |
| <i>Pb</i> global 'C' int. screen | CCGTGTGAATATGCTCATTTTTG                         |

### Supplementary Table 6 | Oligonucleotides used in this study

Oligonucleotide name and sequence used in this study are shown. Bold indicates restriction endonuclease sites.
